# Supplementary material for: The Nutraceutical Properties of Sumac (Rhus coriaria L.) against Gastritis: Antibacterial and Anti-Inflammatory Activities in Gastric Epithelial Cells Infected with H. pylori
Source: MDPI journal article supplement (doi:10.3390/nu14091757), 2022-04-22
Supplement: s1 [file s1]

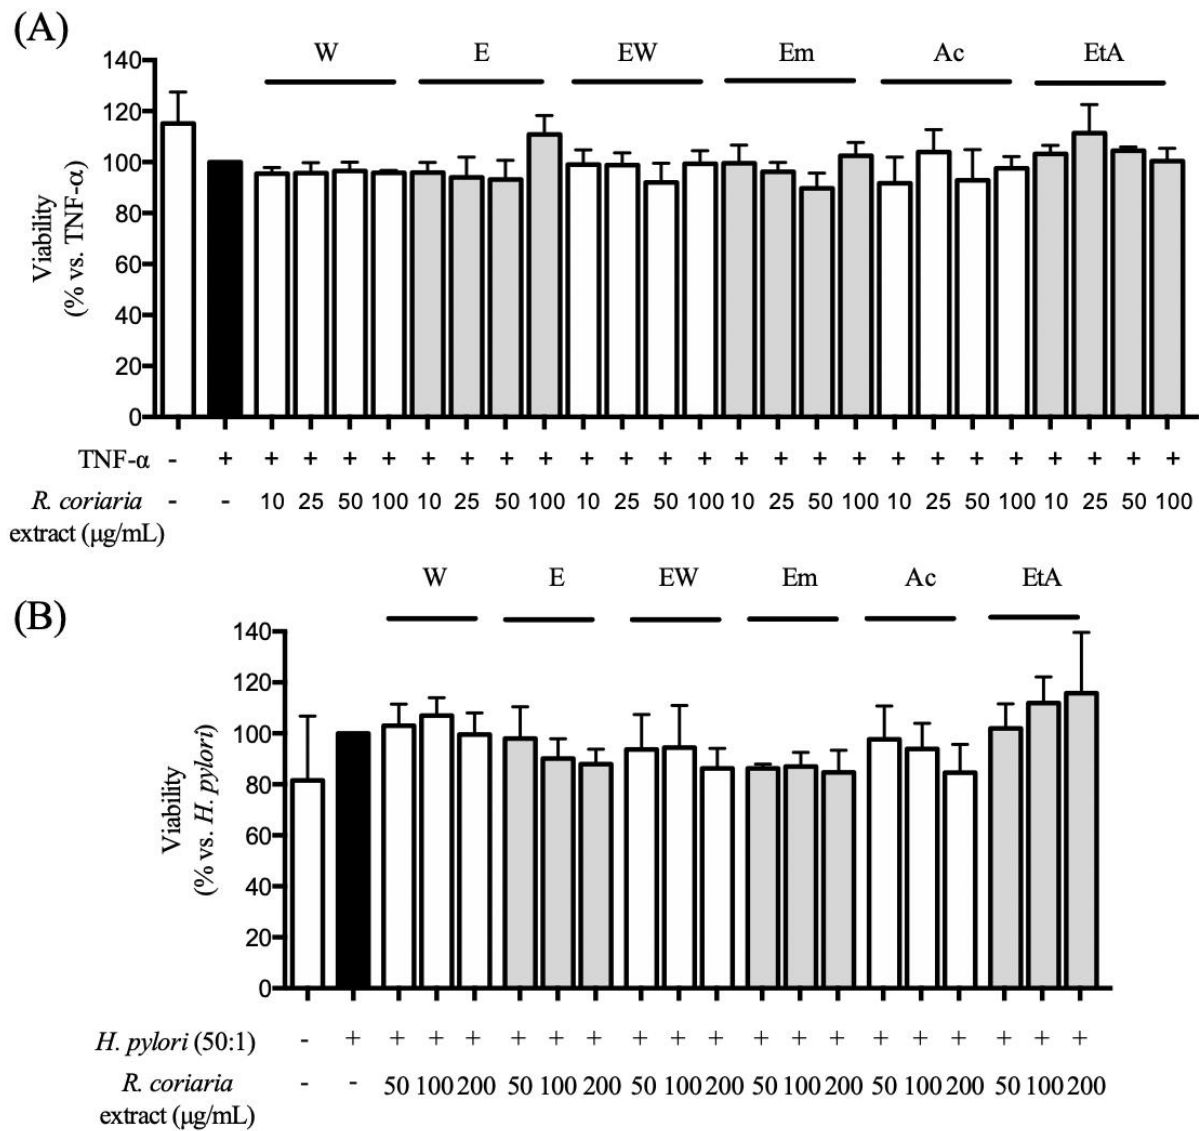

**Figure S1.** Evaluation of cellular viability of *Rhus coriaria* extracts. MTT assay was performed on *Rhus coriaria* L. extracts at concentrations ranging between 10 and 200  $\mu\text{g/mL}$ . All the extracts did not show any toxicity in both GES-1 cells stimulated with TNF- $\alpha$  (A) and GES-1/*H. pylori* co-culture (B). MTT, 3-(4,5-dimethylthiazol-2-yl)-2,5-diphenyltetrazolium bromide; TNF- $\alpha$ , tumor necrosis factor alpha; W, Water; E, Ethanol; EW, Ethanol-water; Em, Macerated ethanol; Ac, Acetone; EtA, Ethylacetate; *R. coriaria*, *Rhus coriaria*; *H. pylori*, *Helicobacter pylori*; GES-1, gastric epithelial cells; - and +, absence or presence of the respective conditions.

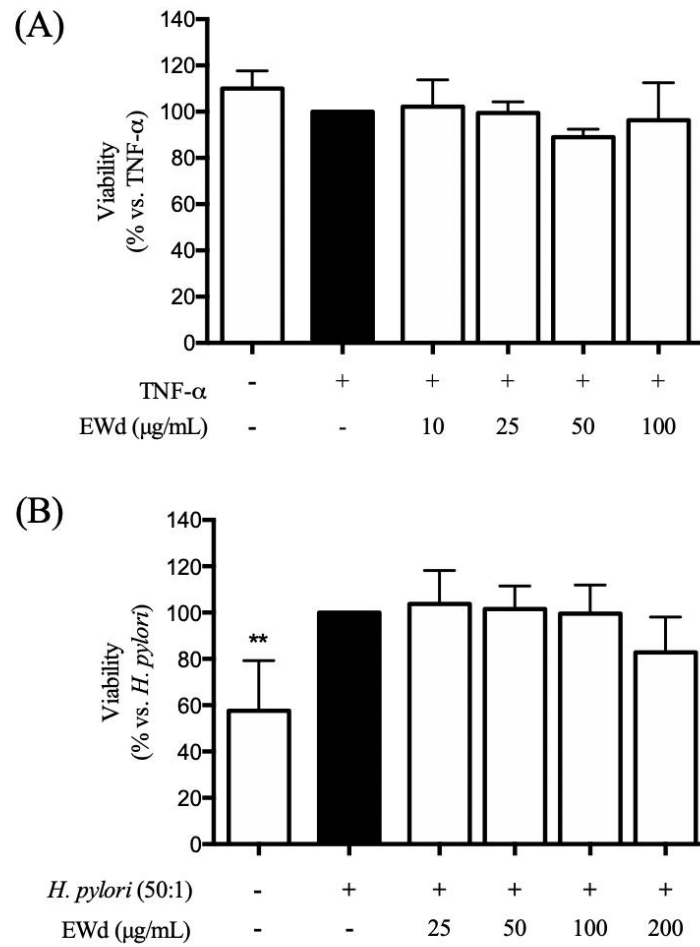

**Figure S2.** Evaluation of cellular viability of *Rhus coriaria* EWd extract. MTT assay was performed on *Rhus coriaria* L. ethanol-water digested (EWd) extract between 10 and 200 μg/mL. The extract did not show any toxicity in both GES-1 cells stimulated with TNF-α (A) and GES-1/*H. pylori* co-culture (B). EWd, EW extract subjected to in vitro simulated gastric digestion.
